# Supplementary material for: Incidence and impact of food aversions among patients with cancer receiving outpatient chemotherapy: a one-year prospective survey
Source: PubMed Central journal article supplement (PMC11579046; doi:10.1007/s00520-024-09028-7), 2024-11-20
Supplement: 520_2024_9028_MOESM1_ESM.pdf [file 520_2024_9028_MOESM1_ESM.pdf]

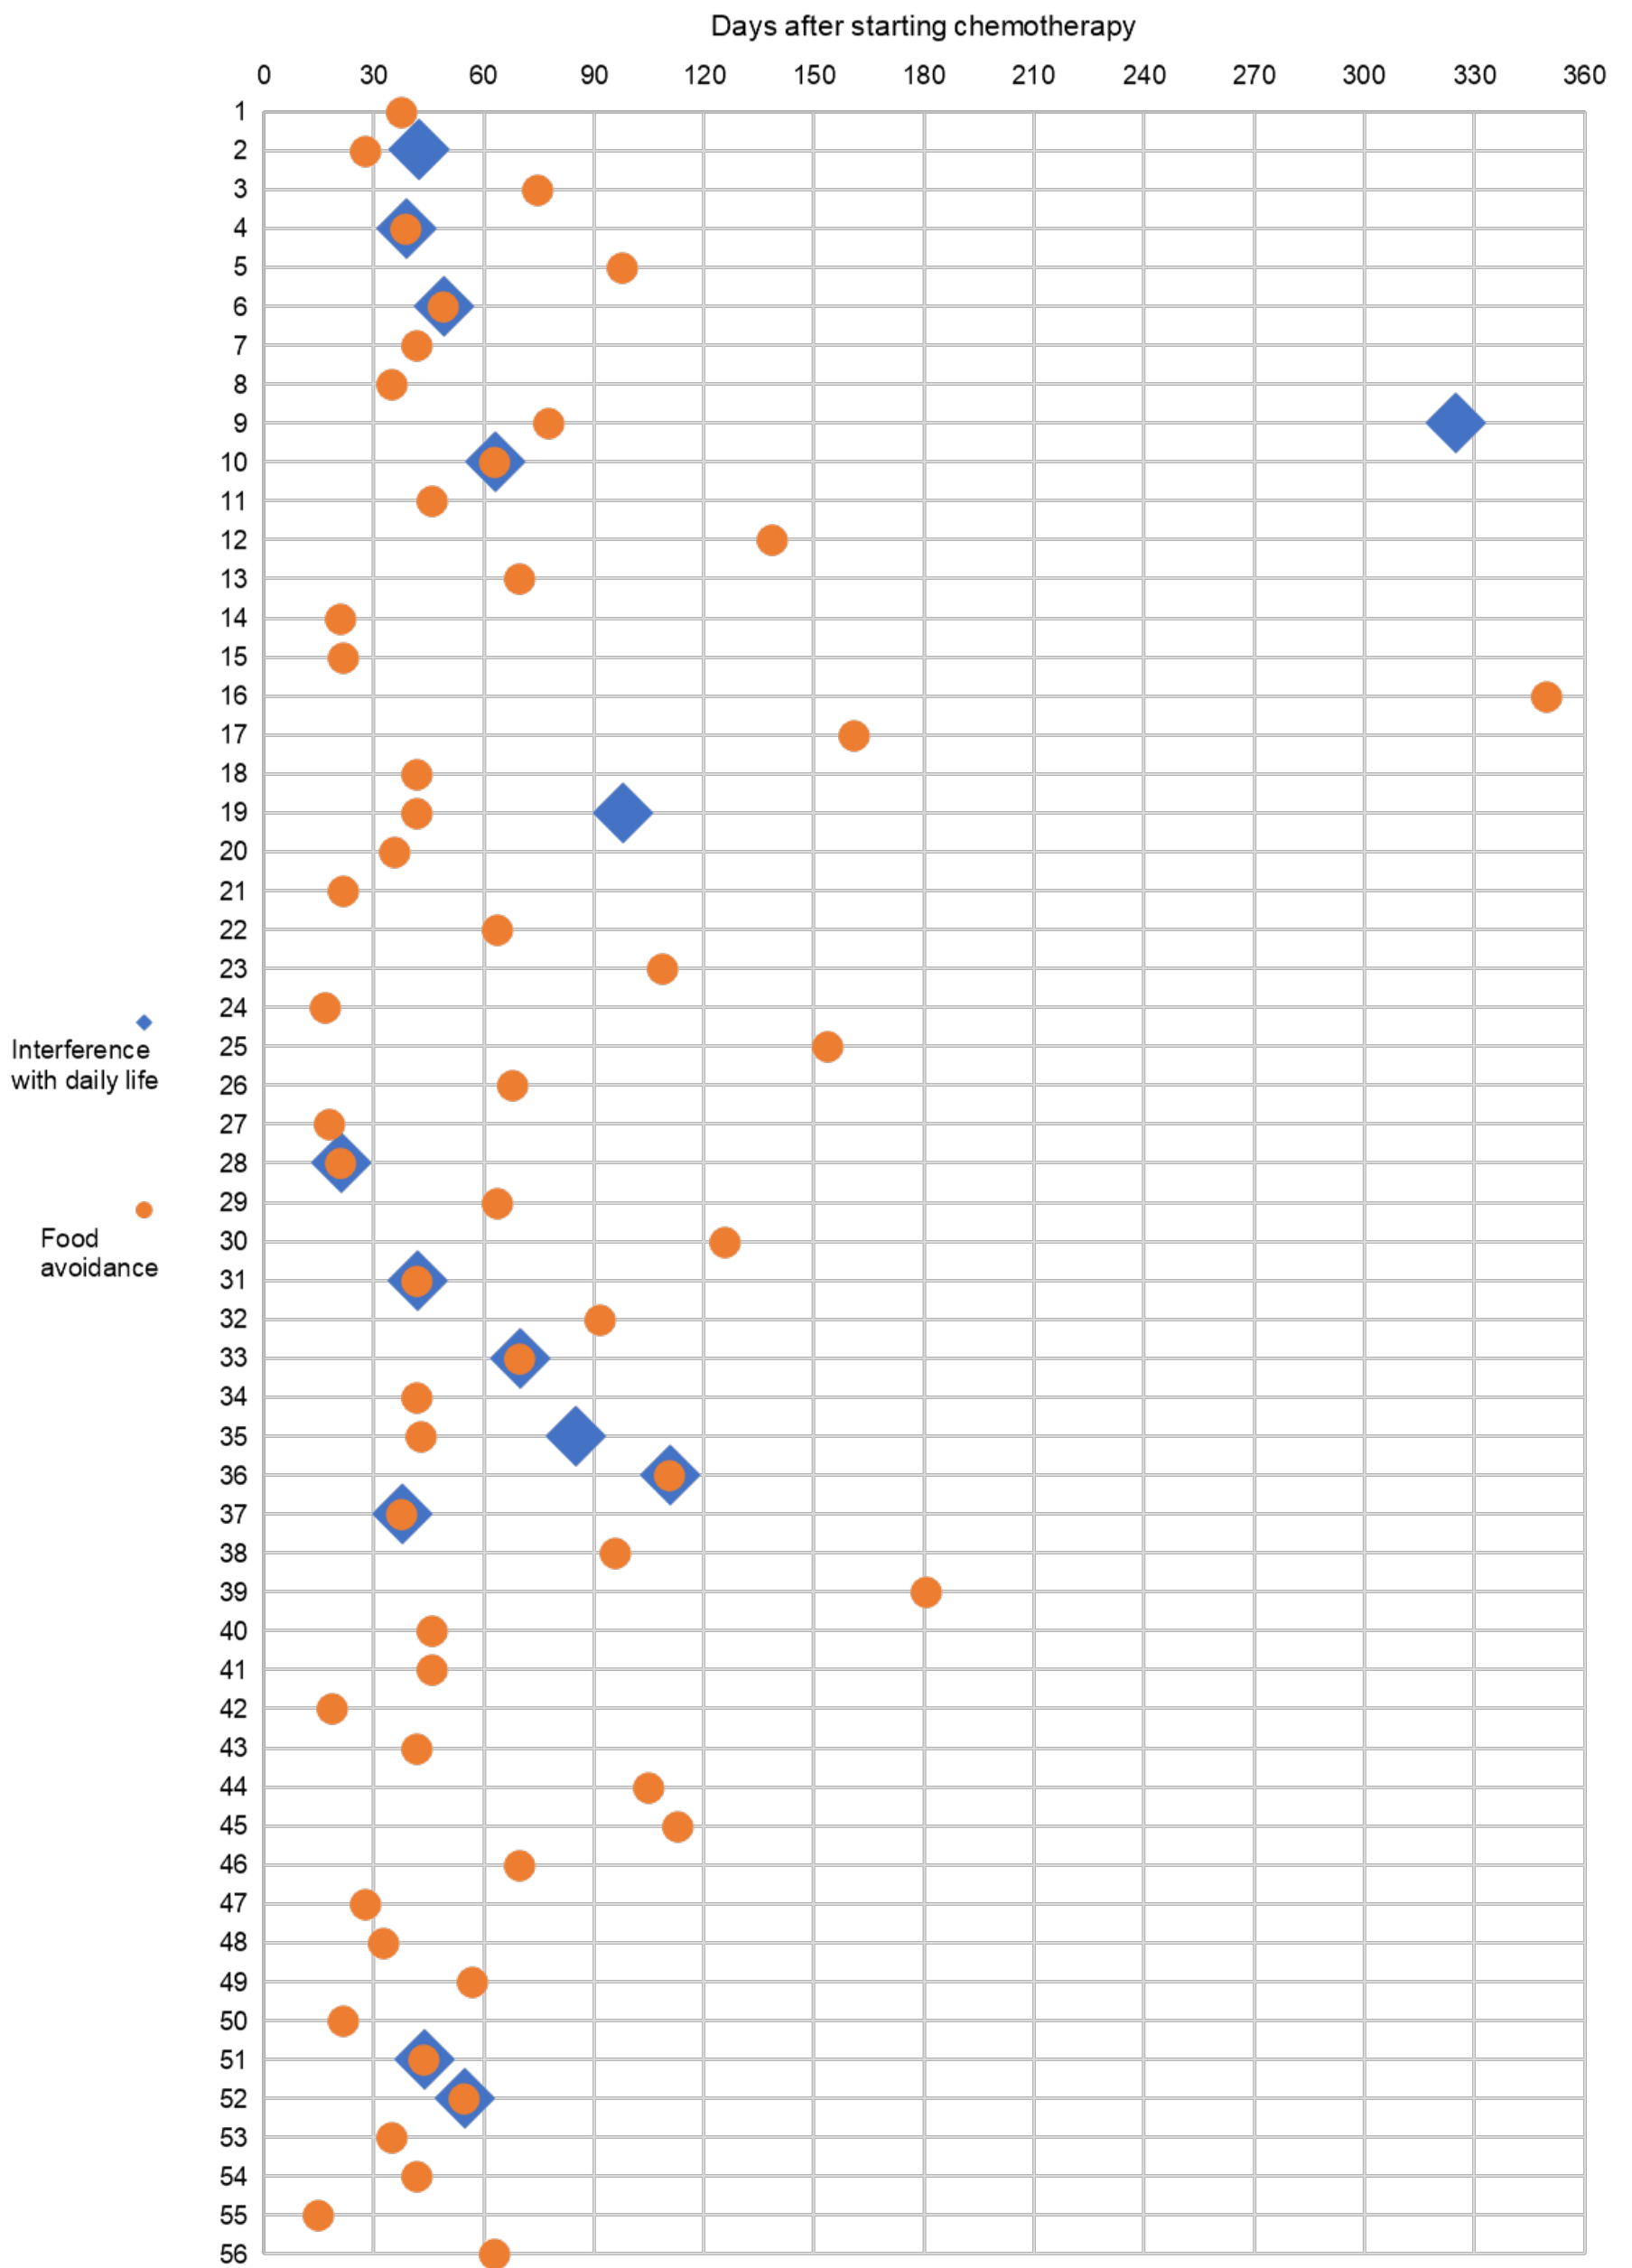

Appendix. Individual time courses for incidence of eating problems
